# Supplementary material for: A zero-background fluorescent probe for sensing and imaging of glutathione via the “covalent-assembly” approach
Source: Royal Society of Chemistry journal article supplement (doi:10.1039/d4ob01181c), 2024-01-01
Supplement: d4ob01181c1.pdf [file d4ob01181c1.pdf]

# **Zero background fluorescent probe for sensing and imaging of glutathione via the “covalent-assembly” approach**

Zheng Yang,\* Zhiyao Wang, Ying Peng, Hao Yang, Qian Wang, Xiaodan Jia, and  
Xiangrong Liu

College of Chemistry and Chemical Engineering, Xi'an University of Science and  
Technology, Xi'an 710054, P. R. China.

\*Corresponding author: yangzheng@xust.edu.cn; orcid.org/0000-0002-1554-4794.

## **CONTENTS**

|                                           |            |
|-------------------------------------------|------------|
| <b>1. The optical properties of probe</b> | <b>S2</b>  |
| <b>2. Calculation of the LODs</b>         | <b>S13</b> |
| <b>3. IR, NMR and MS spectra</b>          | <b>S15</b> |
| <b>4. Theoretical calculation</b>         | <b>S20</b> |
| <b>5. MTT assay results of the probe</b>  | <b>S21</b> |

## 1. Optical properties of the probe.

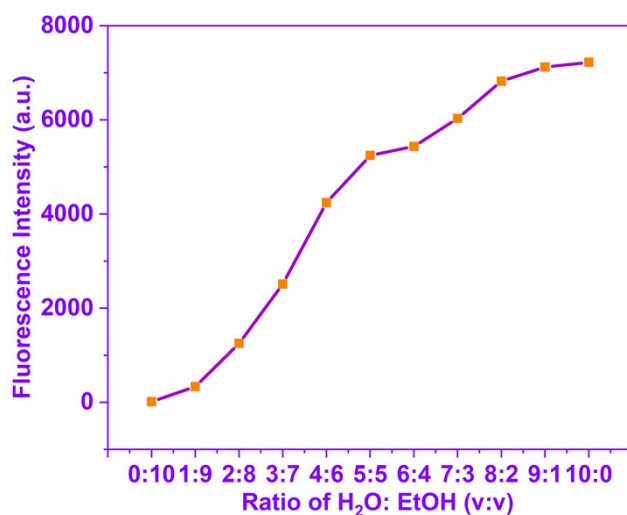

**Fig. S1** Fluorescence intensity of probe *RI* ( $20 \mu\text{mol}\cdot\text{L}^{-1}$ ) in presence of 25 equiv. of GSH in different EtOH-H<sub>2</sub>O solutions with PBS buffer ( $0.1 \text{ mol}\cdot\text{L}^{-1}$ , pH 7.4),  $\lambda_{\text{ex}} = 430 \text{ nm}$ .

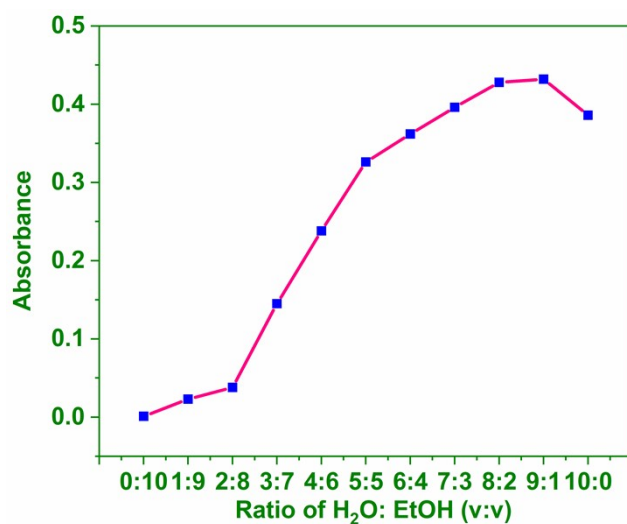

**Fig. S2** Absorbance of probe *RI* ( $20 \mu\text{mol}\cdot\text{L}^{-1}$ ) in presence of 25 equiv. of GSH in different EtOH-H<sub>2</sub>O solutions with PBS buffer ( $0.1 \text{ mol}\cdot\text{L}^{-1}$ , pH 7.4).

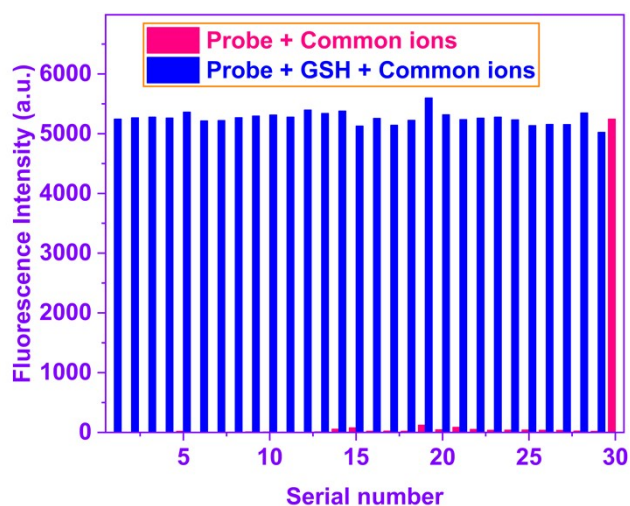

**Fig. S3** Fluorescence intensity changes of probe **RI** ( $20 \mu\text{mol}\cdot\text{L}^{-1}$ ) in EtOH-H<sub>2</sub>O (1:1, v/v, PBS, pH 7.4) over the analytes of interest ( $500 \mu\text{mol}\cdot\text{L}^{-1}$ ). Pink bars represent the fluorescence response of probe **RI** to: 1, blank, 2, Na<sup>+</sup>, 3, K<sup>+</sup>, 4, Ag<sup>+</sup>, 5, Ca<sup>2+</sup>, 6, Mg<sup>2+</sup>, 7, Cu<sup>2+</sup>, 8, Cd<sup>2+</sup>, 9, Mn<sup>2+</sup>, 10, Fe<sup>2+</sup>, 11, Co<sup>2+</sup>, 12, Ni<sup>2+</sup>, 13, Zn<sup>2+</sup>, 14, Pb<sup>2+</sup>, 15, Hg<sup>2+</sup>, 16, Fe<sup>3+</sup>, 17, Cr<sup>3+</sup>, 18, Al<sup>3+</sup>, 19, Sn<sup>4+</sup>, 20, O<sub>2</sub><sup>-</sup>, 21, H<sub>2</sub>O<sub>2</sub>, 22, NO, 23, ONOO<sup>-</sup>, 24, NO<sub>3</sub><sup>-</sup>, 25, PO<sub>4</sub><sup>3-</sup>, 26, CO<sub>3</sub><sup>2-</sup>, 27, OAc<sup>-</sup>, 28, C<sub>2</sub>O<sub>4</sub><sup>2-</sup>, 29, ClO<sup>-</sup>, 30, GSH. Blue bars represent the fluorescence response with subsequent addition of 25 equiv. of GSH to the above solutions,  $\lambda_{\text{ex}} = 430 \text{ nm}$ .

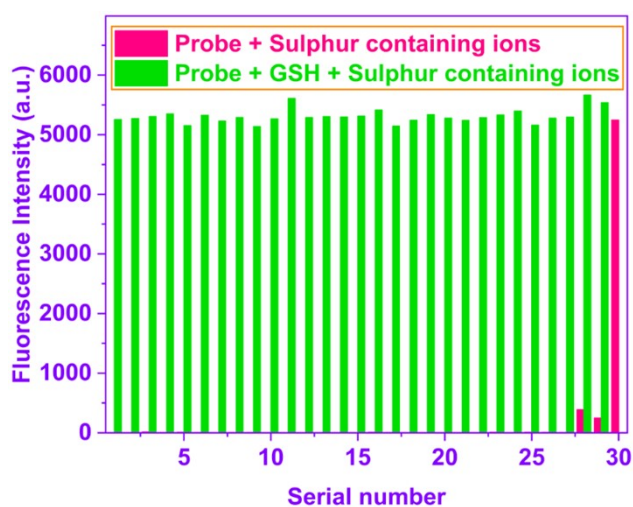

**Fig. S4** Absorbance changes of probe **RI** ( $20 \mu\text{mol}\cdot\text{L}^{-1}$ ) in EtOH-H<sub>2</sub>O (5:5, v/v, PBS, pH 7.4) over the analytes of interest ( $500 \mu\text{mol}\cdot\text{L}^{-1}$ ). Green bars represent the fluorescence response of probe **RI** to: 1, blank, 2, Na<sup>+</sup>, 3, K<sup>+</sup>, 4, Ag<sup>+</sup>, 5, Ca<sup>2+</sup>, 6, Mg<sup>2+</sup>, 7, Cu<sup>2+</sup>, 8, Cd<sup>2+</sup>, 9, Mn<sup>2+</sup>, 10, Fe<sup>2+</sup>, 11, Co<sup>2+</sup>, 12, Ni<sup>2+</sup>, 13, Zn<sup>2+</sup>, 14, Pb<sup>2+</sup>, 15, Hg<sup>2+</sup>, 16, Fe<sup>3+</sup>, 17, Cr<sup>3+</sup>, 18, Al<sup>3+</sup>, 19, Sn<sup>4+</sup>, 20, O<sub>2</sub><sup>-</sup>, 21, H<sub>2</sub>O<sub>2</sub>, 22, NO, 23, ONOO<sup>-</sup>, 24, NO<sub>3</sub><sup>-</sup>, 25, PO<sub>4</sub><sup>3-</sup>, 26, CO<sub>3</sub><sup>2-</sup>, 27, OAc<sup>-</sup>, 28, C<sub>2</sub>O<sub>4</sub><sup>2-</sup>, 29, ClO<sup>-</sup>, 30, GSH. Pink bars represent the fluorescence response with subsequent addition of 25 equiv. of GSH to the above solutions.

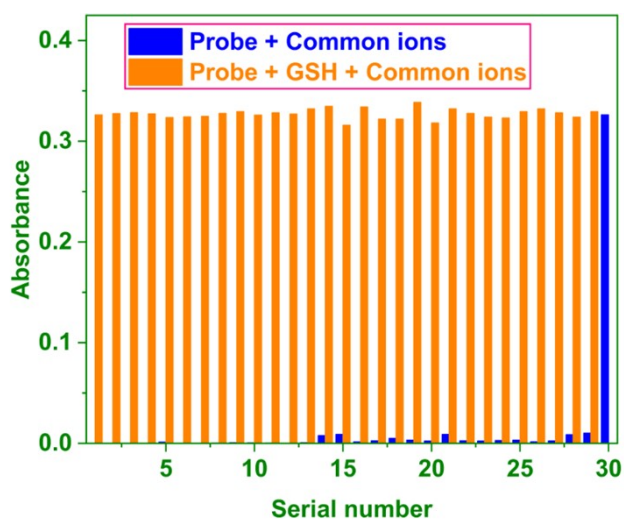

**Fig. S5** Fluorescence intensity changes of probe *RI* ( $20 \mu\text{mol}\cdot\text{L}^{-1}$ ) in EtOH-H<sub>2</sub>O (5:5, v/v, PBS, pH 7.4) over the analytes of interest ( $500 \mu\text{mol}\cdot\text{L}^{-1}$ ). Blue bars represent the fluorescence response of probe *RI* to: 1. Ala, 2. Arg, 3. Glu, 4. Ile, 5. Leu, 6. Lys, 7. Met, 8. Phe, 9. Pro, 10. Ser, 11. Thr, 12. Trp, 13. Tyr, 14. Val, 15. Sec, 16. AA, 17. H<sub>2</sub>S, 18. HS<sup>-</sup>, 19. SO<sub>3</sub><sup>2-</sup>, 20. HSO<sub>3</sub><sup>-</sup>, 21. S<sub>2</sub>O<sub>3</sub><sup>2-</sup>, 22. SO<sub>4</sub><sup>2-</sup>, 23. HSO<sub>4</sub><sup>-</sup>, 24. S<sub>8</sub>, 25. Na<sub>2</sub>S<sub>2</sub>, 26. Na<sub>2</sub>S<sub>4</sub>, 27. PhSH, 28. Cys, 29. Hcy, 30. GSH. Orange bars represent the fluorescence response with subsequent addition of 25 equiv. of GSH to the above solutions,  $\lambda_{\text{ex}} = 430 \text{ nm}$ .

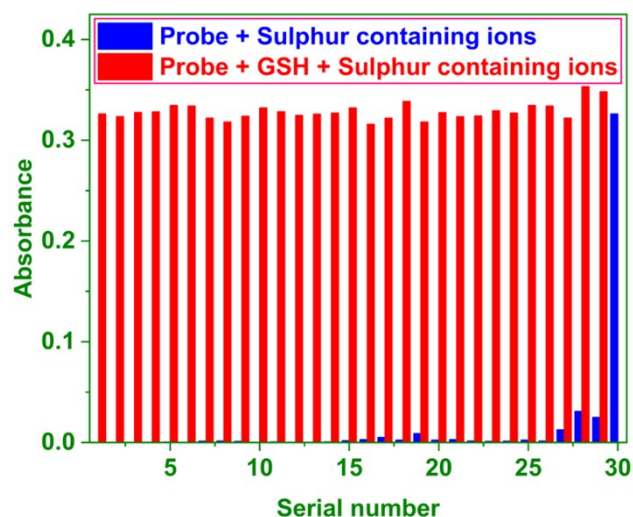

**Fig. S6** Absorbance changes of probe **RI** ( $20 \mu\text{mol}\cdot\text{L}^{-1}$ ) in EtOH-H<sub>2</sub>O (5:5, v/v, PBS, pH 7.4) over the analytes of interest ( $500 \mu\text{mol}\cdot\text{L}^{-1}$ ). Blue bars represent the fluorescence response of probe **RI** to: 1. Ala, 2. Arg, 3. Glu, 4. Ile, 5. Leu, 6. Lys, 7. Met, 8. Phe, 9. Pro, 10. Ser, 11. Thr, 12. Trp, 13. Tyr, 14. Val, 15. Sec, 16. AA, 17. H<sub>2</sub>S, 18. HS<sup>-</sup>, 19. SO<sub>3</sub><sup>2-</sup>, 20. HSO<sub>3</sub><sup>-</sup>, 21. S<sub>2</sub>O<sub>3</sub><sup>2-</sup>, 22. SO<sub>4</sub><sup>2-</sup>, 23. HSO<sub>4</sub><sup>-</sup>, 24. S<sub>8</sub>, 25. Na<sub>2</sub>S<sub>2</sub>, 26. Na<sub>2</sub>S<sub>4</sub>, 27. PhSH, 28. Cys, 29. Hcy, 30. GSH. Red bars represent the fluorescence response with subsequent addition of 25 equiv. of GSH to the above solutions.

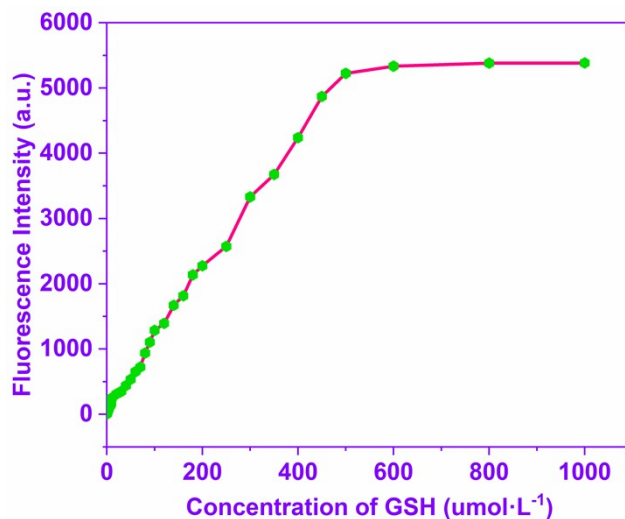

**Fig. S7** Fluorescence intensity change of probe *RI* ( $20 \mu\text{mol}\cdot\text{L}^{-1}$ ) in EtOH-H<sub>2</sub>O (1:1, v/v, PBS, pH 7.4) solution as a function of thiols concentration at 540 nm,  $\lambda_{\text{ex}} = 430$  nm.

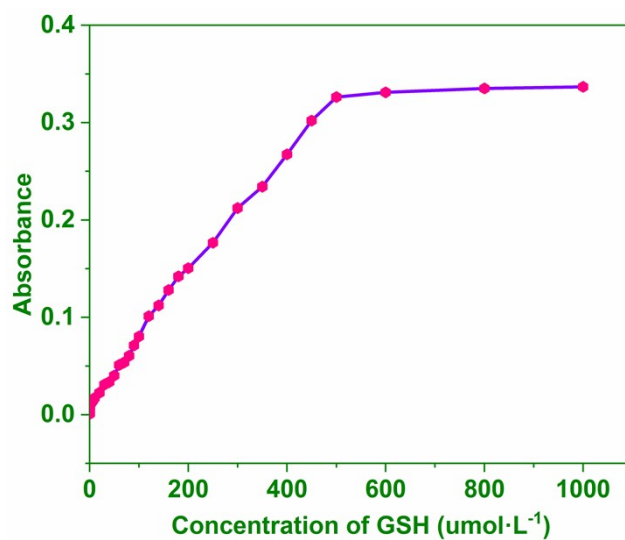

**Fig. S8** Absorption intensity change of probe *RI* ( $20 \mu\text{mol}\cdot\text{L}^{-1}$ ) in EtOH-H<sub>2</sub>O (1:1, v/v, PBS, pH 7.4) solution as a function of thiols concentration at 509 nm.

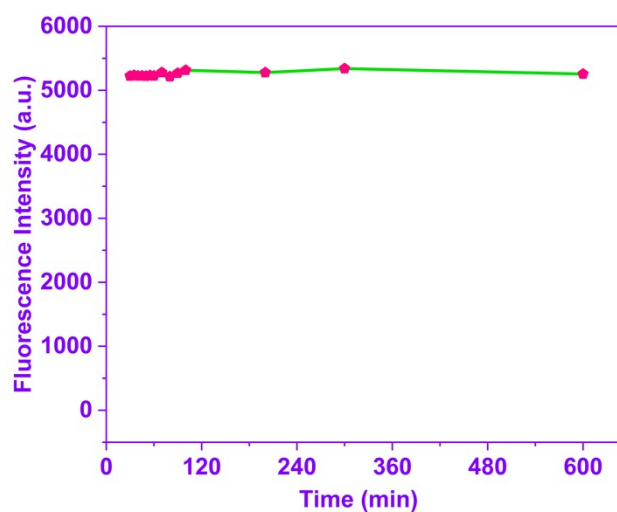

**Fig. S9** Fluorescence intensity change of probe *RI* ( $20 \mu\text{mol}\cdot\text{L}^{-1}$ ) upon addition of GSH ( $500 \mu\text{mol}\cdot\text{L}^{-1}$ ) with different reaction time in EtOH–H<sub>2</sub>O (1:1, v:v, PBS, pH = 7.4) solution.,  $\lambda_{\text{ex}} = 430 \text{ nm}$ .

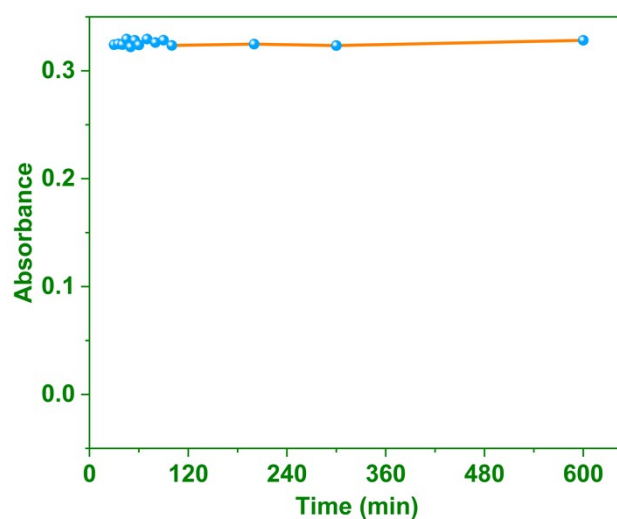

**Fig. S10** Absorption intensity change of probe *RI* ( $20 \mu\text{mol}\cdot\text{L}^{-1}$ ) upon addition of GSH ( $500 \mu\text{mol}\cdot\text{L}^{-1}$ ) with different reaction time in EtOH–H<sub>2</sub>O (1:1, v:v, PBS, pH = 7.4) solution.



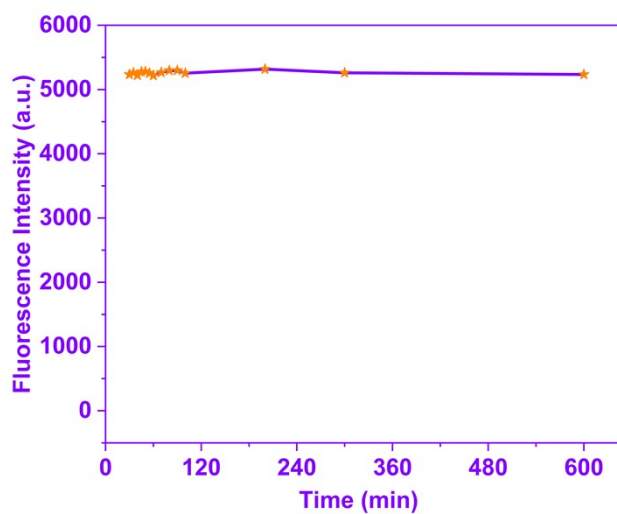

**Fig. S11** Fluorescence intensity change of probe *RI* ( $20 \mu\text{mol}\cdot\text{L}^{-1}$ ) upon addition of GSH ( $500 \mu\text{mol}\cdot\text{L}^{-1}$ ) under the presence of contentious irradiation by 254 nm UV in EtOH–H<sub>2</sub>O (1:1, v:v, PBS, pH = 7.4) solution,  $\lambda_{\text{ex}} = 430 \text{ nm}$ .

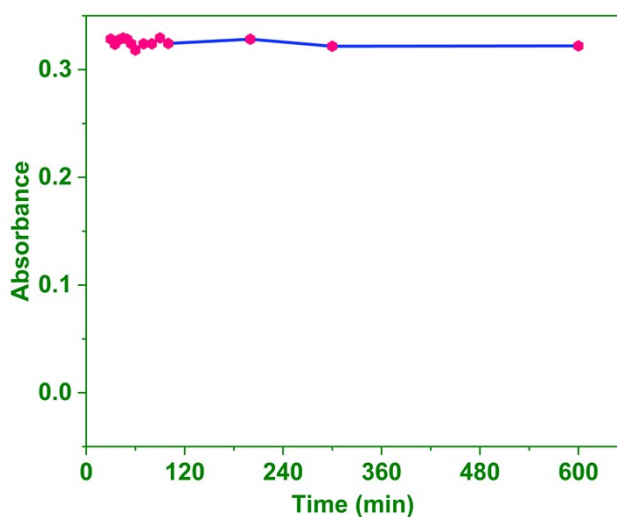

**Fig. S12** Absorption intensity change of probe *RI* ( $20 \mu\text{mol}\cdot\text{L}^{-1}$ ) upon addition of GSH ( $500 \mu\text{mol}\cdot\text{L}^{-1}$ ) under the presence of contentious irradiation by 254 nm UV in EtOH–H<sub>2</sub>O (1:1, v:v, PBS, pH = 7.4) solution.

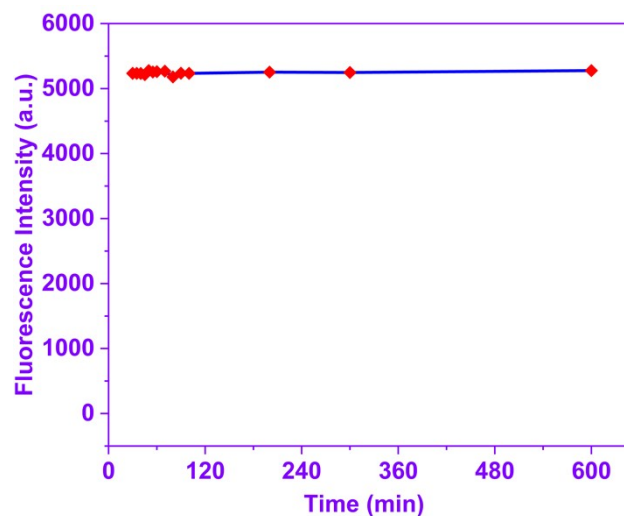

**Fig. S13** Fluorescence intensity change of probe *RI* ( $20 \mu\text{mol}\cdot\text{L}^{-1}$ ) upon addition of GSH ( $500 \mu\text{mol}\cdot\text{L}^{-1}$ ) under the presence of contentious irradiation by 365 nm UV in EtOH–H<sub>2</sub>O (1:1, v:v, PBS, pH = 7.4) solution,  $\lambda_{\text{ex}} = 430 \text{ nm}$ .

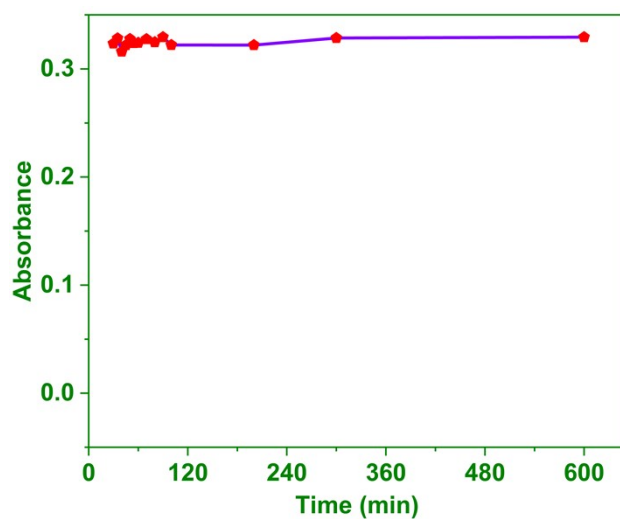

**Fig. S14** Absorption intensity change of probe *RI* ( $20 \mu\text{mol}\cdot\text{L}^{-1}$ ) upon addition of GSH ( $500 \mu\text{mol}\cdot\text{L}^{-1}$ ) under the presence of contentious irradiation by 365 nm UV in EtOH–H<sub>2</sub>O (1:1, v:v, PBS, pH = 7.4) solution.

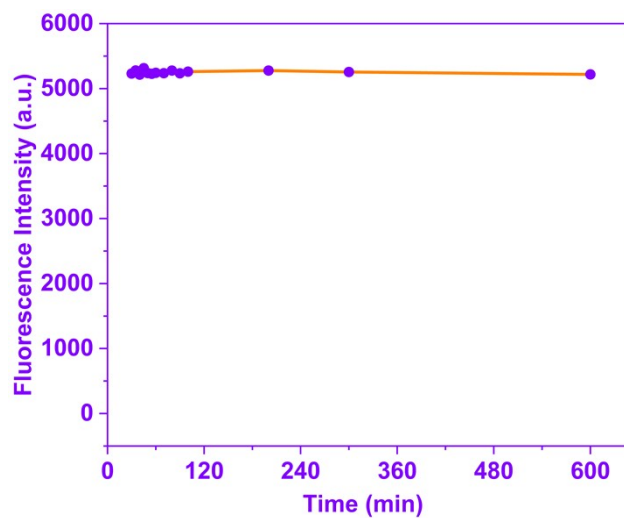

**Fig. S15** Fluorescence intensity change of probe *RI* ( $20 \mu\text{mol}\cdot\text{L}^{-1}$ ) upon addition of GSH ( $500 \mu\text{mol}\cdot\text{L}^{-1}$ ) under the presence of contentious irradiation by Xe lamp in EtOH–H<sub>2</sub>O (1:1, v:v, PBS, pH = 7.4) solution,  $\lambda_{\text{ex}} = 430 \text{ nm}$ .

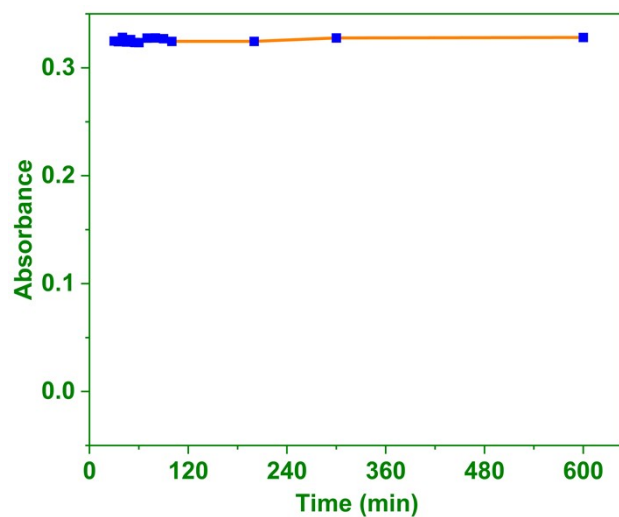

**Fig. S16** Absorption intensity change of probe *RI* ( $20 \mu\text{mol}\cdot\text{L}^{-1}$ ) upon addition of GSH ( $500 \mu\text{mol}\cdot\text{L}^{-1}$ ) under the presence of contentious irradiation by Xe lamp in EtOH–H<sub>2</sub>O (1:1, v:v, PBS, pH = 7.4) solution.

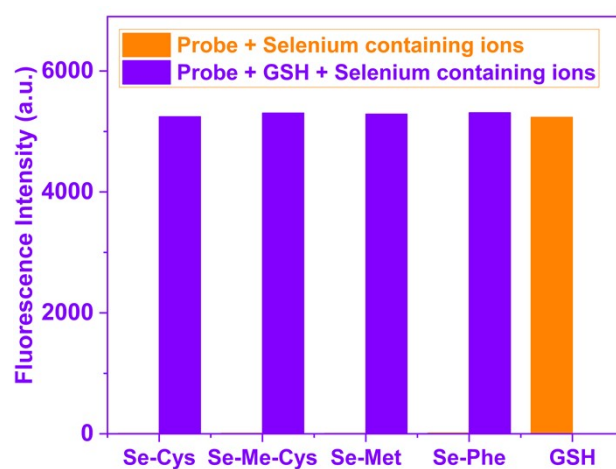

**Fig. S17** Selective and Competitive investigation for the fluorescence response of **R1** ( $20 \mu\text{mol}\cdot\text{L}^{-1}$ ) over selenium containing compounds ( $500 \mu\text{mol}\cdot\text{L}^{-1}$ ) in EtOH–H<sub>2</sub>O (1:1, v:v, PBS, pH = 7.4) solution,  $\lambda_{\text{ex}} = 430 \text{ nm}$ .

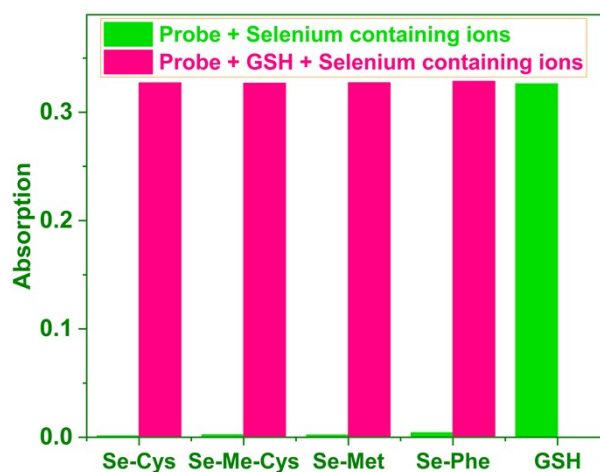

**Fig. S18** Selective and Competitive investigation for the absorption response of **R1** ( $20 \mu\text{mol}\cdot\text{L}^{-1}$ ) over selenium containing compounds ( $500 \mu\text{mol}\cdot\text{L}^{-1}$ ) in EtOH–H<sub>2</sub>O (1:1, v:v, PBS, pH = 7.4) solution.

## 2. Calculation of the LOD.

The detection limits were estimated based on the Kaiser's definition:

$$y_d = y_b + KS_b \text{ (off-on)}$$

$y_d$  is the detection limit of the sample.  $y_b$  present the mean value fluorescence intensity of the blank samples.  $S_b$  is the population standard deviation of the blank.

The K value is 3 (M. Belter, A. Sajnog, D. Baralkiewicz, *Talanta*, 2014, **129**, 606.).

**Table S1.** Fluorescence intensity and the Standard deviation of the blank samples

|           | Fl. Intensity | Mean value | Standard deviation | $y_d = y_b + KS_b$ |
|-----------|---------------|------------|--------------------|--------------------|
| Blank #1  | 5.242         |            |                    |                    |
| Blank #2  | 5.873         |            |                    |                    |
| Blank #3  | 6.372         |            |                    |                    |
| Blank #4  | 5.837         |            |                    |                    |
| Blank #5  | 5.362         |            |                    |                    |
| Blank #6  | 6.372         | 6.211      | 0.630              | 8.101              |
| Blank #7  | 7.213         |            |                    |                    |
| Blank #8  | 6.432         |            |                    |                    |
| Blank #9  | 6.882         |            |                    |                    |
| Blank #10 | 6.524         |            |                    |                    |

[a]  $y_d$  is the detection limit of the sample.  $y_b$  present the mean value fluorescence intensity of the blank samples.  $S_b$  is the population standard deviation of the blank.

The K value is 3.

**Table S2.** Fluorescence intensity and corresponding concentration of thiols

| [GSH] ( $\mu\text{mol}\cdot\text{L}^{-1}$ ) | FL. Intensity (GSH) |
|---------------------------------------------|---------------------|
| 0.1                                         | 6.605               |
| 0.2                                         | 6.173               |
| 0.3                                         | 7.615               |
| 0.4                                         | 8.105               |
| 0.5                                         | 10.21               |
| 0.6                                         | 15.11               |
| 0.7                                         | 21.28               |
| 0.8                                         | 27.66               |
| 0.9                                         | 33.07               |
| 1                                           | 36.21               |

### 3. IR, NMR and MS spectra.

#### Acquisition Parameter

|             |            |                       |           |                  |           |
|-------------|------------|-----------------------|-----------|------------------|-----------|
| Source Type | ESI        | Ion Polarity          | Positive  | Set Nebulizer    | 0.4 Bar   |
| Focus       | Not active | Set Capillary         | 4500 V    | Set Dry Heater   | 180 °C    |
| Scan Begin  | 50 m/z     | Set End Plate Offset  | -500 V    | Set Dry Gas      | 4.0 l/min |
| Scan End    | 3000 m/z   | Set Collision Cell RF | 110.0 Vpp | Set Divert Valve | Source    |

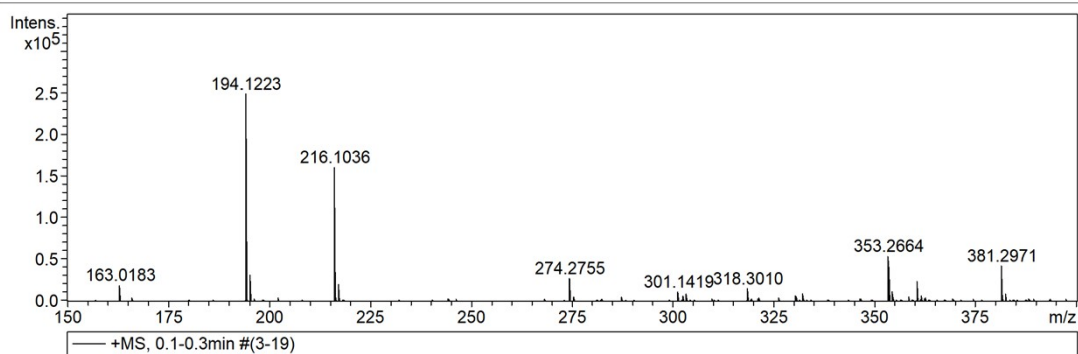

Fig. S19 Mass spectrum of compound 1.

#### Acquisition Parameter

|             |            |                       |           |                  |           |
|-------------|------------|-----------------------|-----------|------------------|-----------|
| Source Type | ESI        | Ion Polarity          | Positive  | Set Nebulizer    | 0.3 Bar   |
| Focus       | Not active | Set Capillary         | 4500 V    | Set Dry Heater   | 180 °C    |
| Scan Begin  | 50 m/z     | Set End Plate Offset  | -500 V    | Set Dry Gas      | 4.0 l/min |
| Scan End    | 3000 m/z   | Set Collision Cell RF | 110.0 Vpp | Set Divert Valve | Source    |

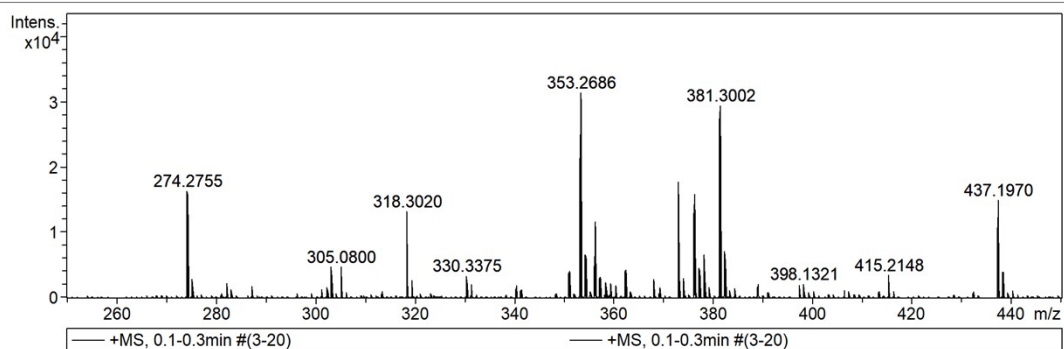

Fig. S20 Mass spectrum of compound 2.

**Acquisition Parameter**

|             |            |                       |           |                  |           |
|-------------|------------|-----------------------|-----------|------------------|-----------|
| Source Type | ESI        | Ion Polarity          | Positive  | Set Nebulizer    | 0.4 Bar   |
| Focus       | Not active | Set Capillary         | 4500 V    | Set Dry Heater   | 180 °C    |
| Scan Begin  | 50 m/z     | Set End Plate Offset  | -500 V    | Set Dry Gas      | 4.0 l/min |
| Scan End    | 3000 m/z   | Set Collision Cell RF | 110.0 Vpp | Set Divert Valve | Source    |

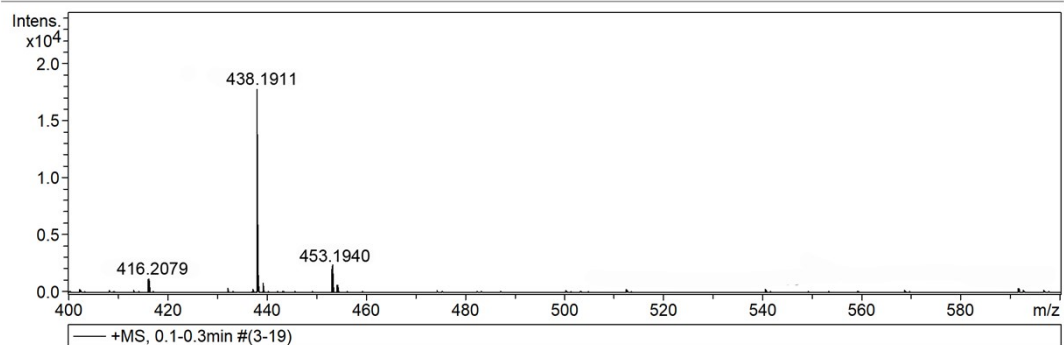

**Fig. S21** Mass spectrum of probe *RI*.

**Acquisition Parameter**

|             |            |                       |           |                  |           |
|-------------|------------|-----------------------|-----------|------------------|-----------|
| Source Type | ESI        | Ion Polarity          | Positive  | Set Nebulizer    | 0.4 Bar   |
| Focus       | Not active | Set Capillary         | 4500 V    | Set Dry Heater   | 180 °C    |
| Scan Begin  | 50 m/z     | Set End Plate Offset  | -500 V    | Set Dry Gas      | 4.0 l/min |
| Scan End    | 3000 m/z   | Set Collision Cell RF | 110.0 Vpp | Set Divert Valve | Source    |

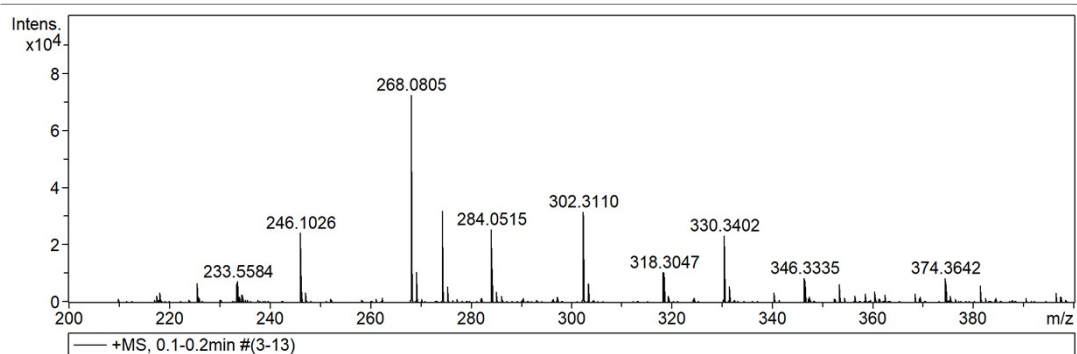

**Fig. S22** Mass spectrum of probe *RI* + GSH.



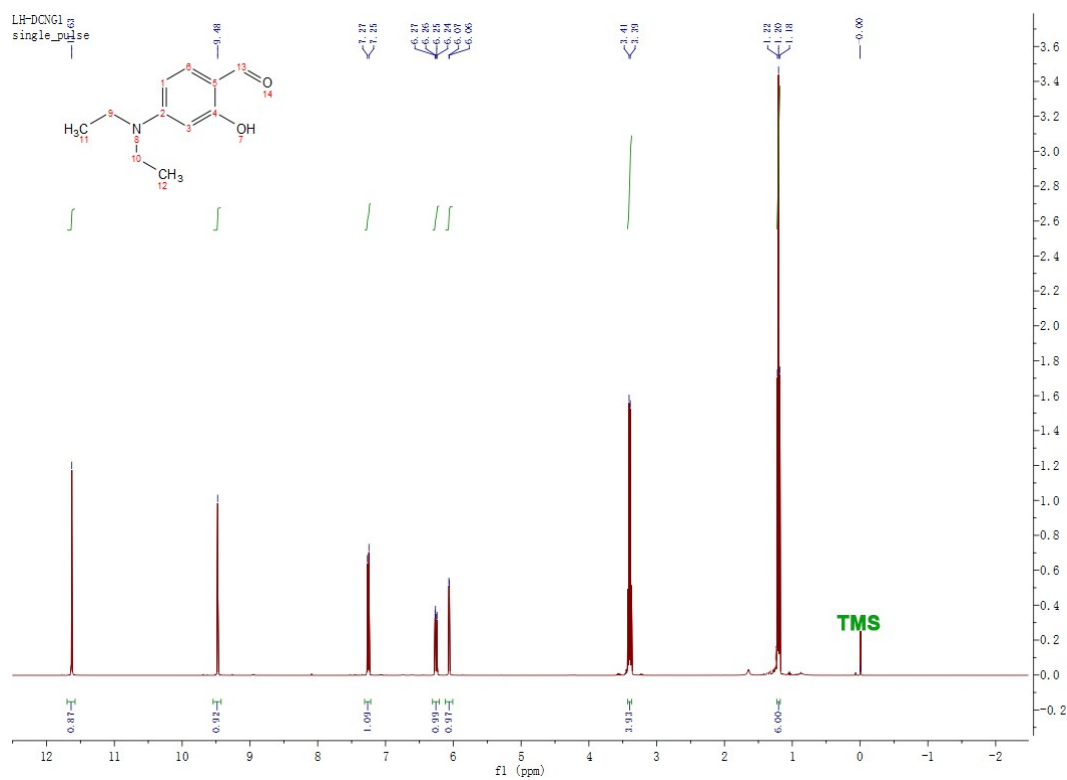

Fig. S23 <sup>1</sup>H NMR spectrum of compound 1 in CDCl<sub>3</sub>.

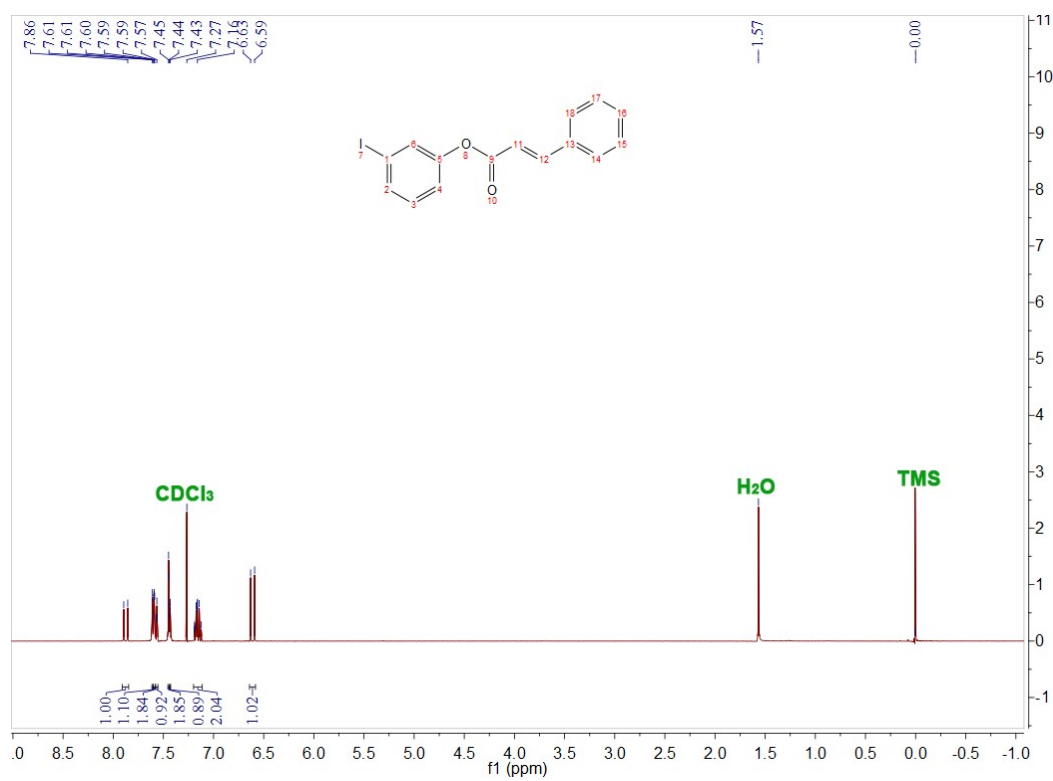

Fig. S24 <sup>1</sup>H NMR spectrum of compound 2 in CDCl<sub>3</sub>.

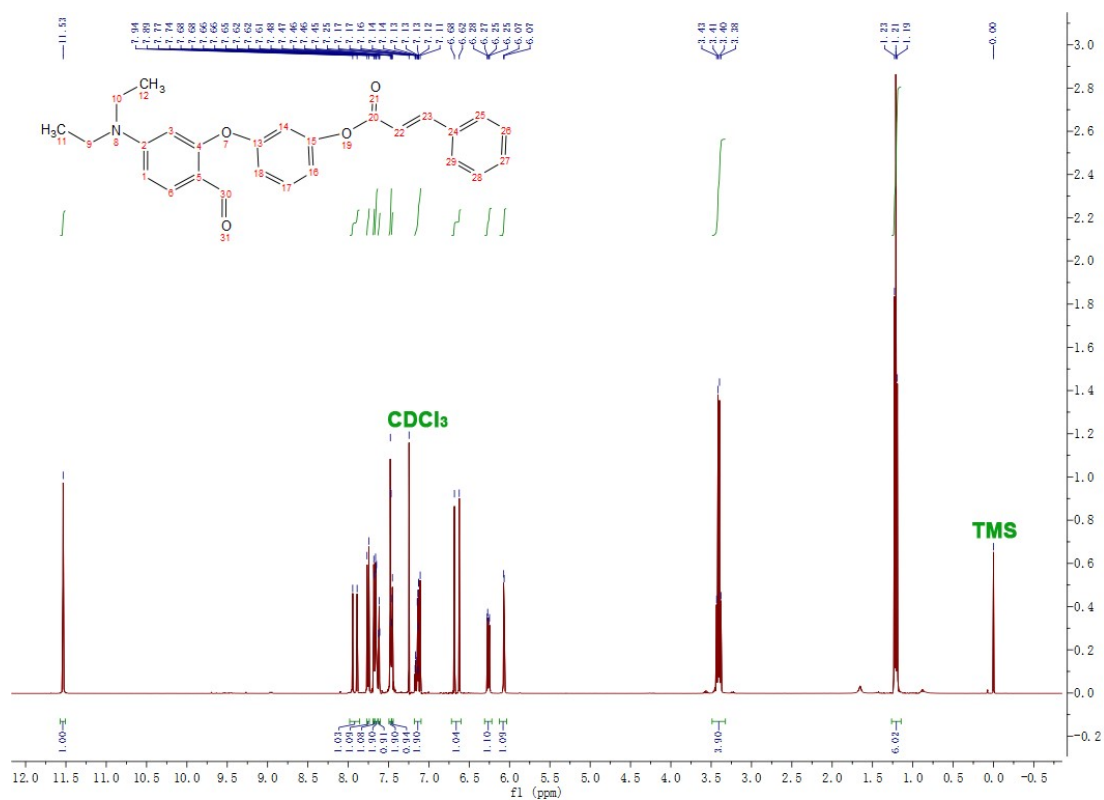

Fig. S25 <sup>1</sup>H NMR spectrum of probe *R1* in CDCl<sub>3</sub>.

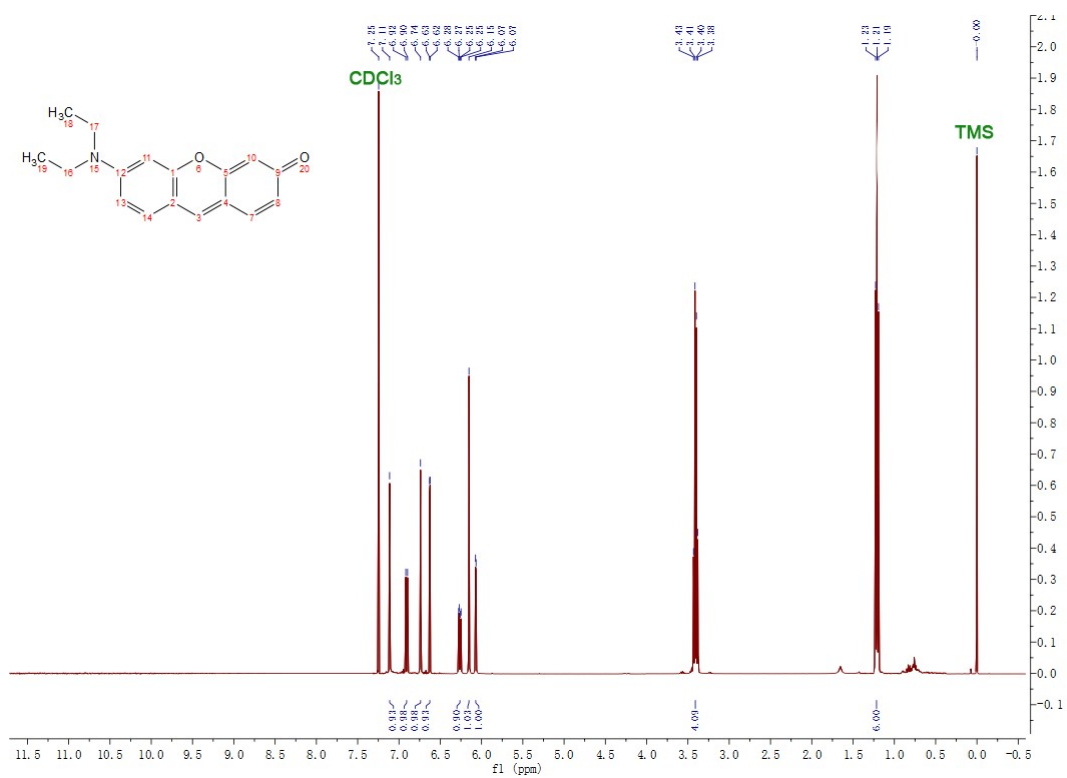

Fig. S26 <sup>1</sup>H NMR spectrum of probe *R1* + GSH in CDCl<sub>3</sub>.

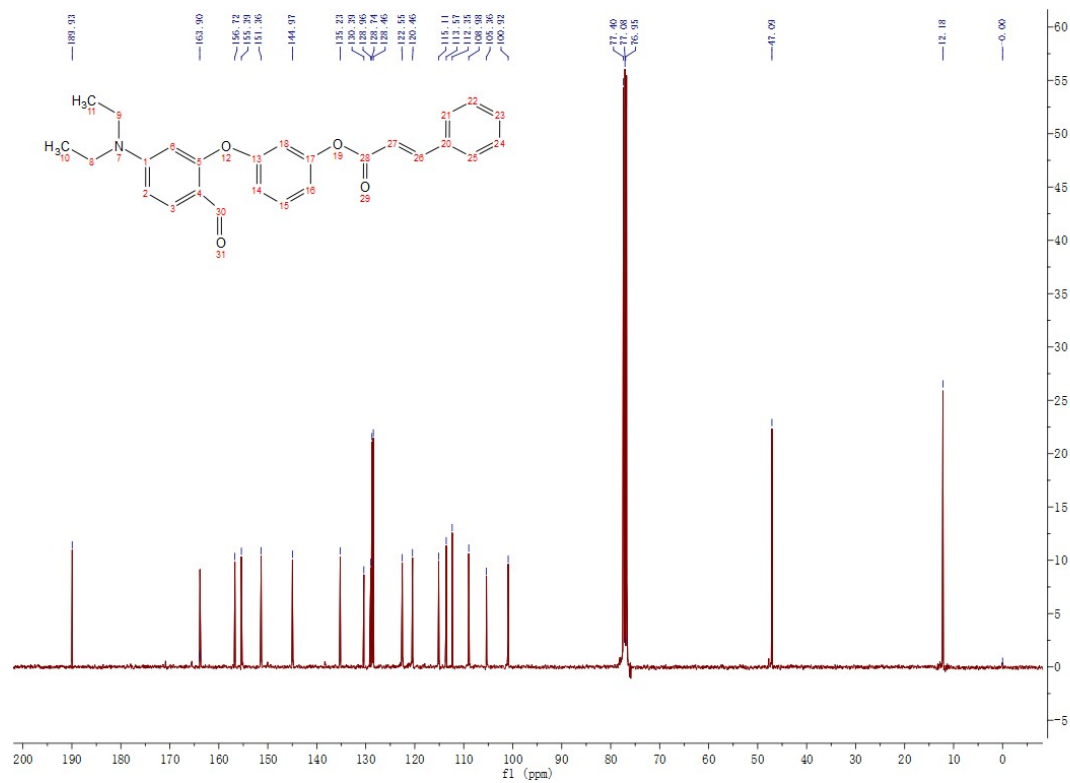

**Fig. S27**  $^{13}\text{C}$  NMR spectrum of probe *RI* in  $\text{CDCl}_3$ .

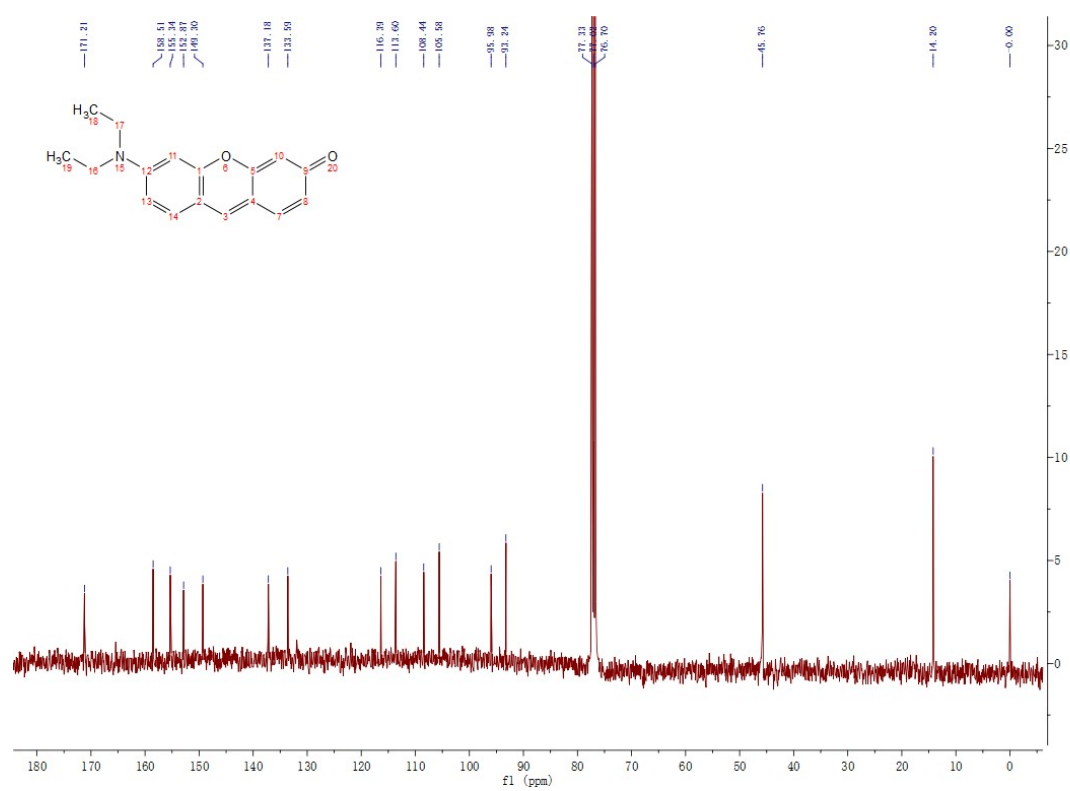

**Fig. S28**  $^{13}\text{C}$  NMR spectrum of probe *RI* + GSH in  $\text{CDCl}_3$ .

## 4. Theoretical calculation

All theoretical calculations including HOMO/LUMO energies and electrostatic potential (ESP) were performed by the Gaussian 09 program. The geometry optimization of ground states was computed with density functional theory (DFT). The probe was optimized with a combination of basis of double- $\zeta$  quality consisting of 6-31G\*\* for C, H elements, 6-31+G\* for N, O elements. All the optimized structures were confirmed to be local minimums due to the non-existence of imaginary frequency.

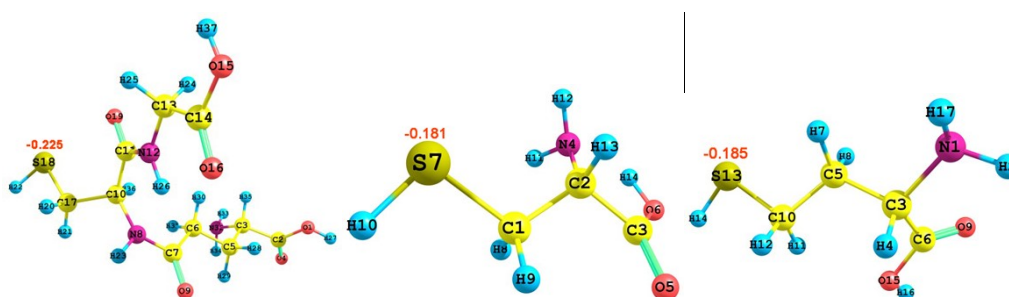

**Fig. S29** The optimized structures and electrostatic potentials of GSH, Cys and Hcy.

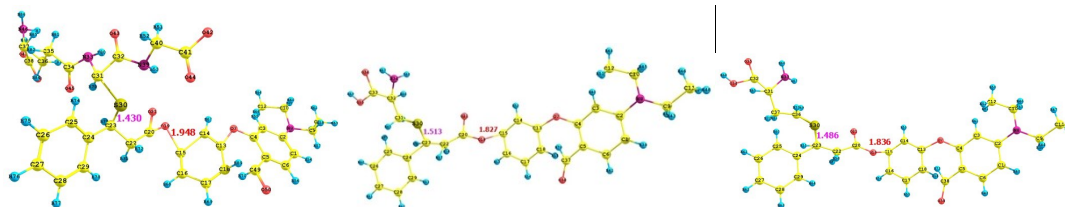

**Fig. S30** The optimized structures and bond lengths of probe R1 with addition of GSH, Cys and Hcy.

**Table. S3** Electrostatic potential of sulfur atom in three thiols and BDE of C-O bond in three transition-state molecules.

| Name | Electrostatic Potential <sup>a</sup> | Name           | BDE (KJ·mol <sup>-1</sup> ) <sup>b</sup> |
|------|--------------------------------------|----------------|------------------------------------------|
| GSH  | -0.079                               | <b>R1</b> +GSH | 35.2312                                  |
| Hcy  | -0.044                               | <b>R1</b> +Hcy | 52.3287                                  |
| Cys  | -0.059                               | <b>R1</b> +Cys | 55.3276                                  |

<sup>a</sup> Electrostatic potential of sulfur atom in three thiols.

<sup>b</sup> Bond dissociation energy.

## 5. MTT assay results of the probe.

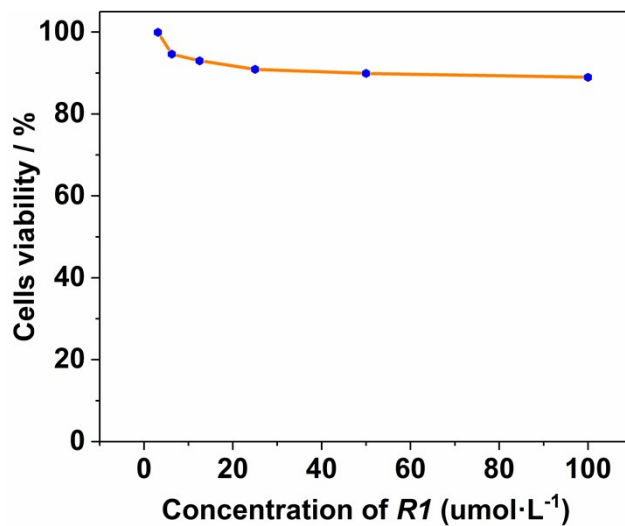

Fig. S31. The influence of cell viability with the change of *R1* concentration.

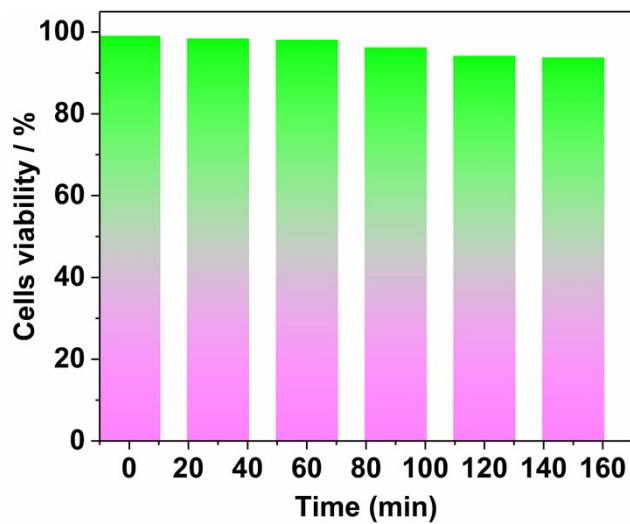

Fig. S32. The relationship between cell viability and incubation time.

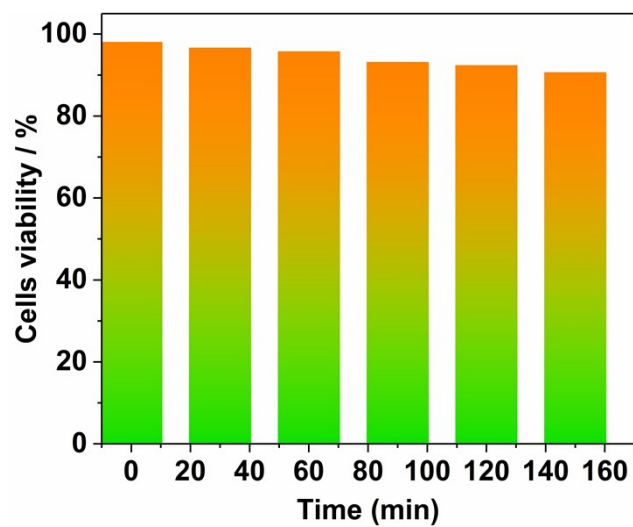

**Fig. S33.** The relationship between cell viability and incubation time in addition of  $20 \mu\text{mol}\cdot\text{L}^{-1}$  of *RI*.

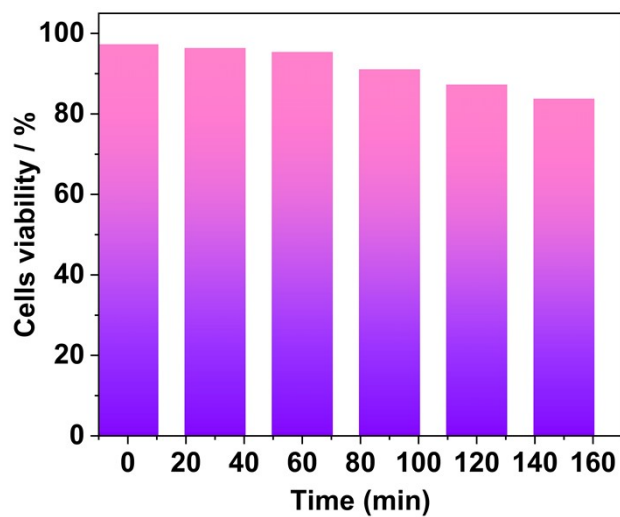

**Fig. S34.** The relationship between cell viability and incubation time in addition of  $20 \mu\text{mol}\cdot\text{L}^{-1}$  of *RI* and 25 equiv. of GSH.

**Table S4.** MTT assay results, calculated inhibition ratio and IC<sub>50</sub> value of the probe *RI* for MG-63 cell.

| <i>[RI]</i> /μM | 1     | 2     | 3     | Average | Inhibition ratio | IC <sub>50</sub> /μM |
|-----------------|-------|-------|-------|---------|------------------|----------------------|
| 3.125           | 0.458 | 0.471 | 0.465 | 0.4647  | 0.0005           |                      |
| 6.25            | 0.435 | 0.432 | 0.453 | 0.4400  | 0.0536           |                      |
| 12.5            | 0.432 | 0.421 | 0.444 | 0.4323  | 0.0701           | >100                 |
| 25              | 0.423 | 0.413 | 0.432 | 0.4227  | 0.0909           |                      |
| 50              | 0.411 | 0.422 | 0.421 | 0.4180  | 0.1009           |                      |
| 100             | 0.402 | 0.427 | 0.412 | 0.4137  | 0.1102           |                      |
